# Supplementary material
Source: MDPI journal article supplement (https://www.mdpi.com/2073-4344/12/10/1099)
Supplement: s1 [file s1]

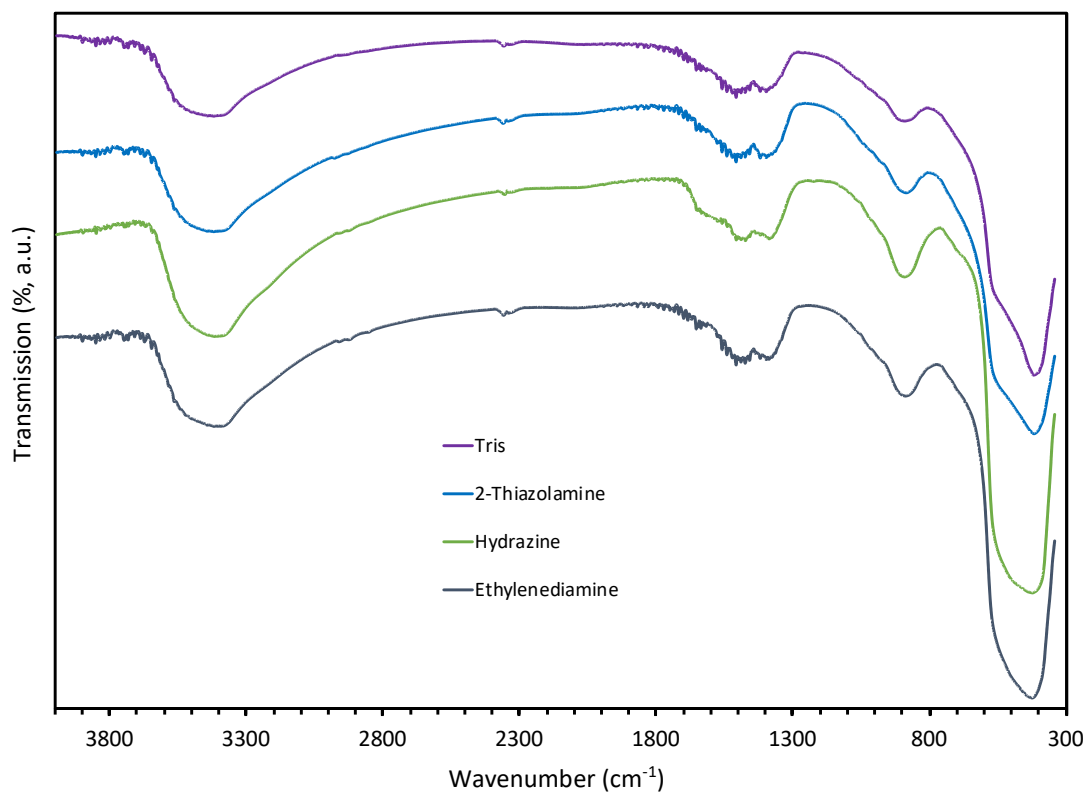

Figure S14. IR spectra of ZnO prepared using  $[\text{Zn}(\text{acetate})_2(\text{Tris})_2]$ ,  $[\text{Zn}(\text{acetate})_2(2\text{-thiazolamine})_2]$ ,  $[\text{Zn}(\text{acetate})_2(\text{hydrazine})_2]$  and  $[\text{Zn}(\text{acetate})_2(\text{ethylenediamine})]$ .
