# Supplementary material
Source: MDPI journal article supplement (https://www.mdpi.com/2073-4344/12/10/1099)
Supplement: s1 [file s1]

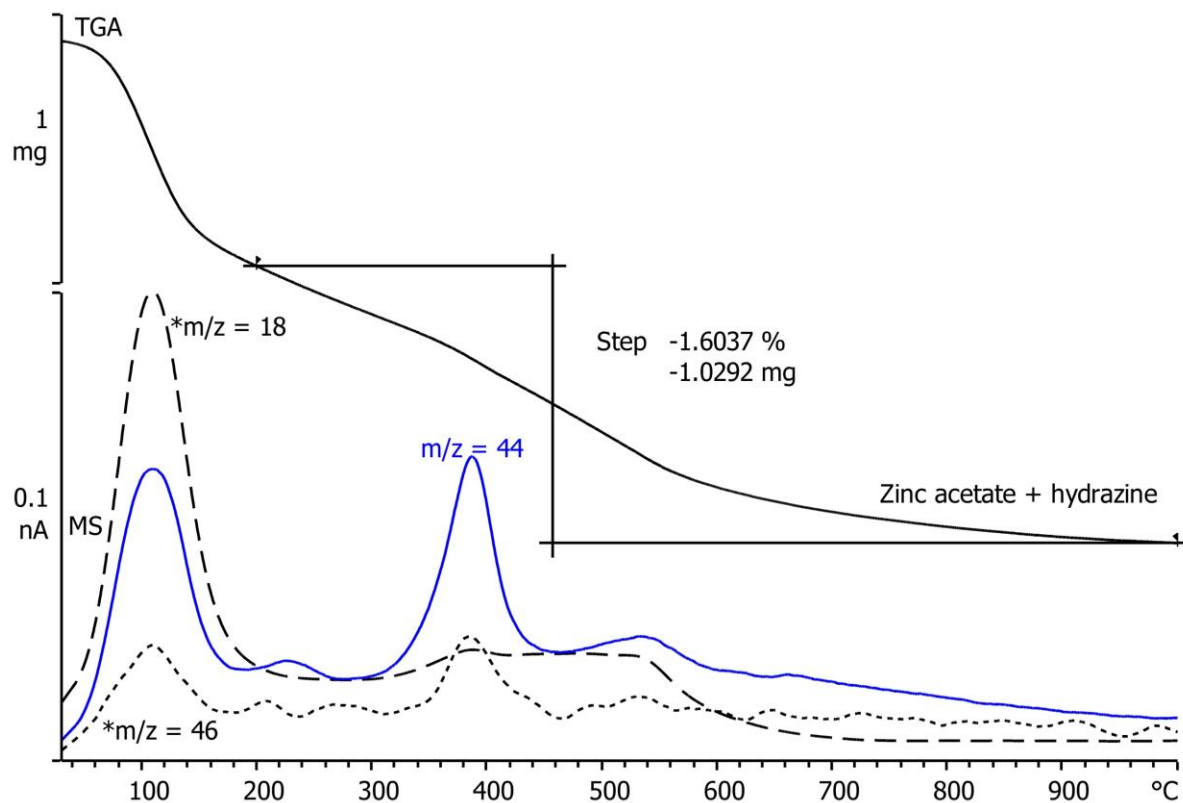

Figure S6. Thermogravimetric analysis (TGA) and mass spectrometry (MS) curves for the heating of ZnO prepared using  $[\text{Zn}(\text{acetate})_2(\text{hydrazine})_2]$  to 1000°C in dry air at a rate of 20°C/min. \*The mass spectrograms for  $m/z = 18$  and  $m/z = 46$  are shown at 10% and 10,000%, respectively, to keep all mass signals on the same scale.
