# Supplementary material
Source: MDPI journal article supplement (https://www.mdpi.com/2073-4344/12/10/1099)
Supplement: s1 [file s1]

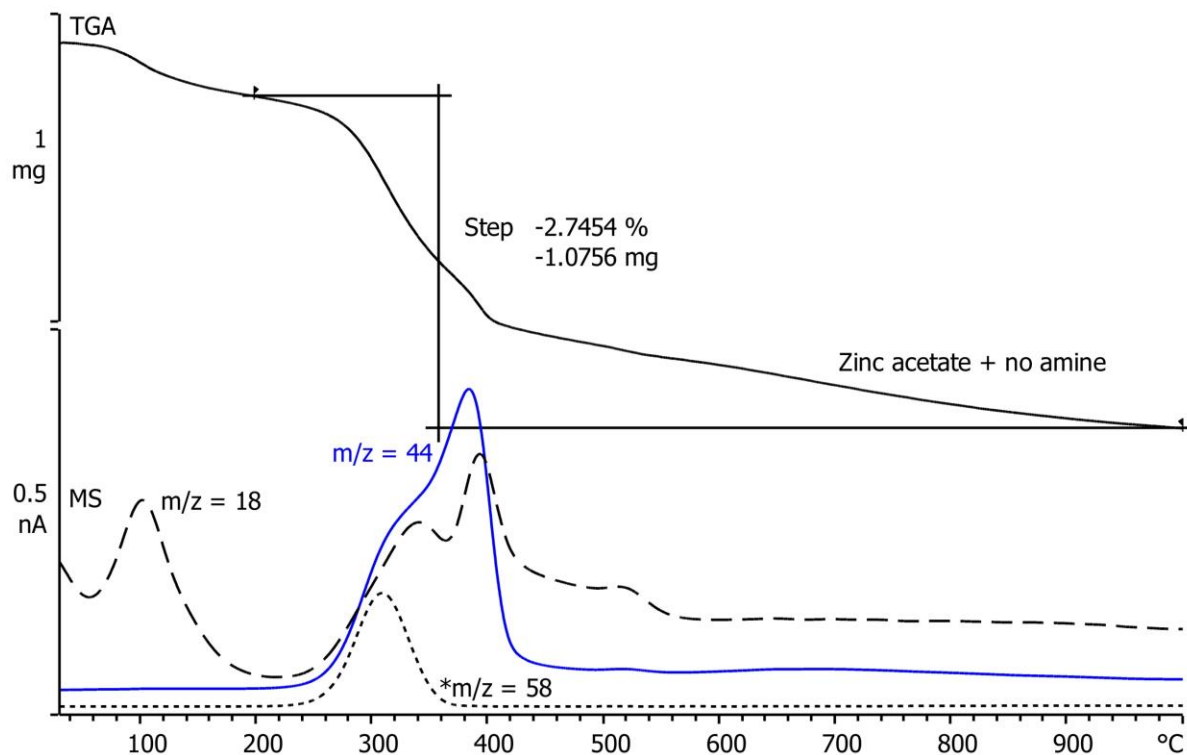

Figure S9. Thermogravimetric analysis (TGA) and mass spectrometry (MS) curves for the heating of ZnO prepared using  $\text{Zn}(\text{acetate})_2$  with no added amine to 1000°C in dry air at a rate of 20°C/min. \*The mass spectrogram for  $m/z = 58$  is shown at 2,000% to keep all mass signals on the same scale.
