# Supplementary material
Source: MDPI journal article supplement (https://www.mdpi.com/2073-4344/12/10/1099)
Supplement: s1 [file s1]

Archive with 14 entries (14 files):
- Figure S1 Tris BET.pdf
- Figure S10 no3-en TGA-MS.pdf
- Figure S11 no3-2thia TGA-MS.pdf
- Figure S12 no3-Hydra TGA-MS.pdf
- Figure S13 no3-tris TGA-MS.pdf
- Figure S14 IR spectra.pdf
- Figure S2 2Thia BET.pdf
- Figure S3 Hydrazine BET.pdf
- Figure S4 en BET.pdf
- Figure S5 acetate-en TGA-MS.pdf
- Figure S6 acetate-hydra TGA-MS.pdf
- Figure S7 acetate-2thia TGA-MS.pdf
- Figure S8 acetate-tris TGA-MS.pdf
- Figure S9 acetate-no amine TGA-MS.pdf
