# Supplementary material
Source: MDPI journal article supplement (https://www.mdpi.com/2073-4344/12/10/1099)
Supplement: s1 [file s1 › Figure S2 2Thia BET.pdf]

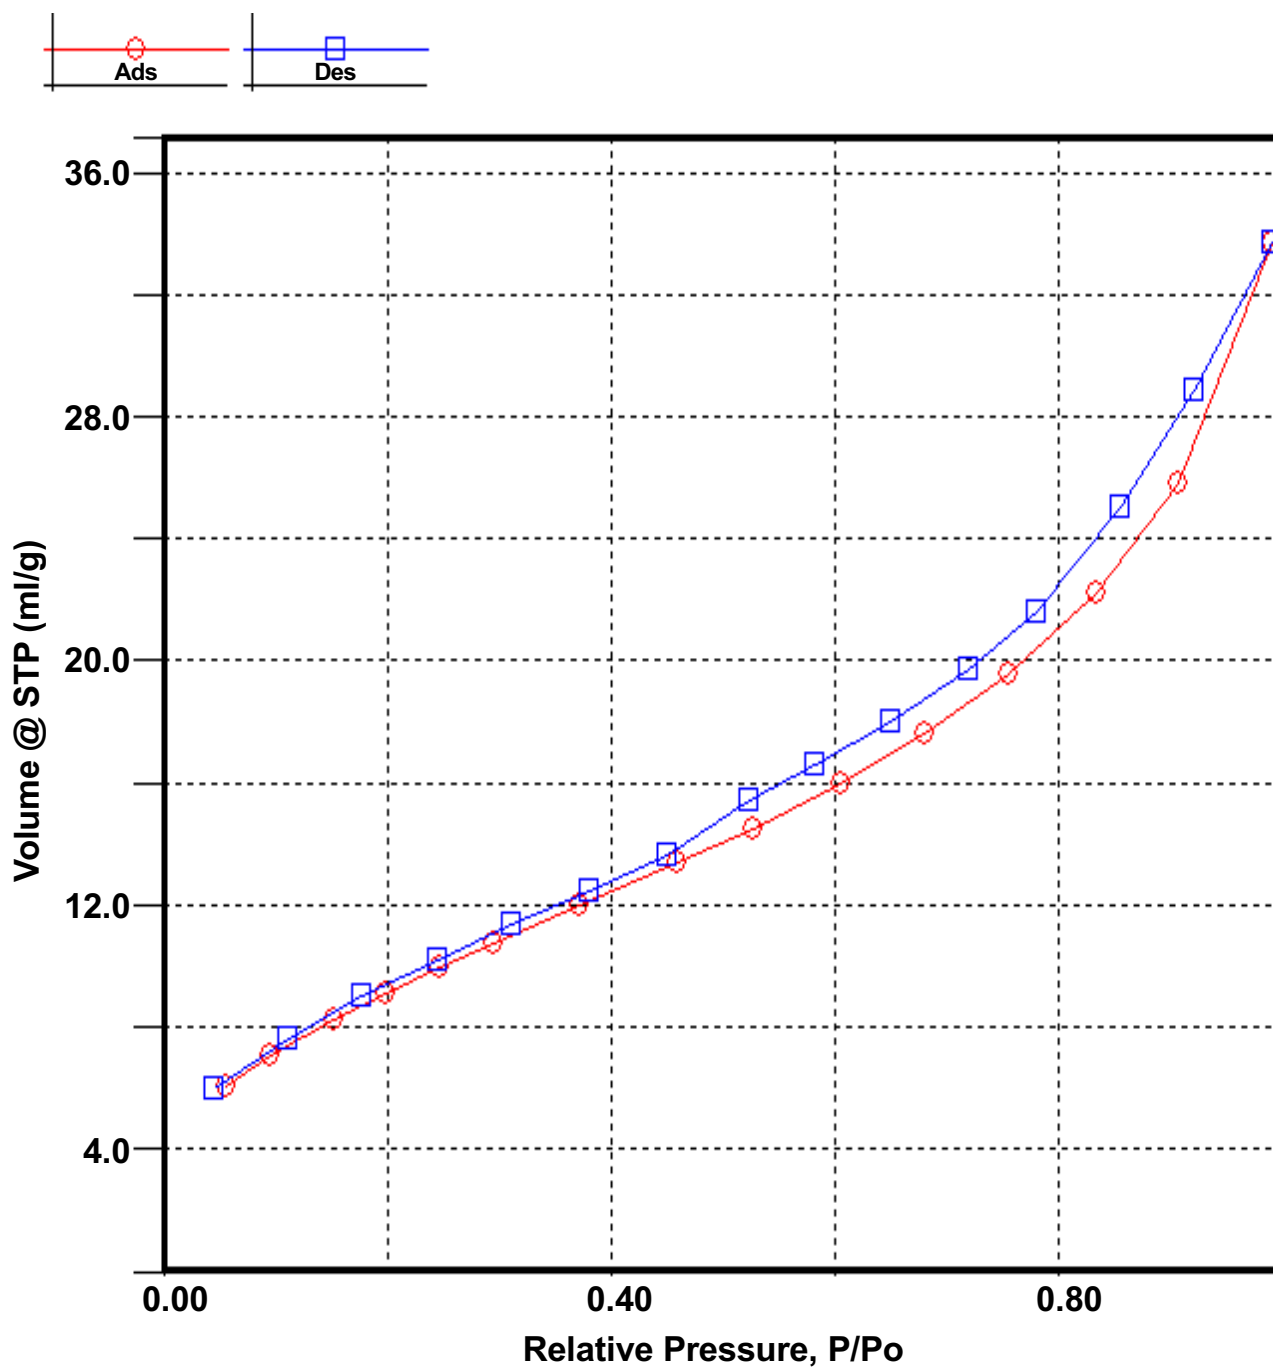

Figure S2. Absorption (red circles), desorption (blue squares) isotherms for BET surface area measurements for ZnO prepared using 2-thiazolamine.
